# Supplementary material
Source: PubMed Central journal article supplement (PMC7657179)
Supplement: CAS-104-1074-s003.pdf [file CAS-104-1074-s003.pdf]

**Cyclophosphamide**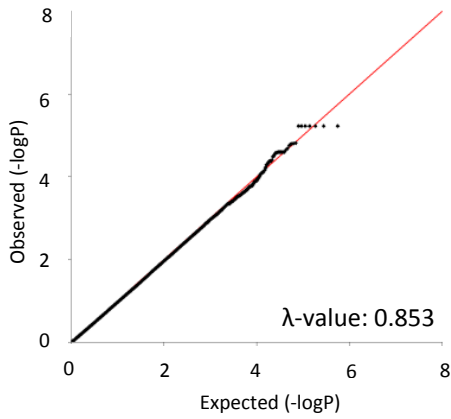**Paclitaxel + Carboplatin**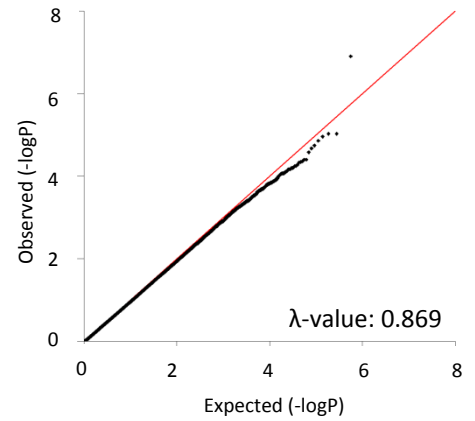**All Platinum-based**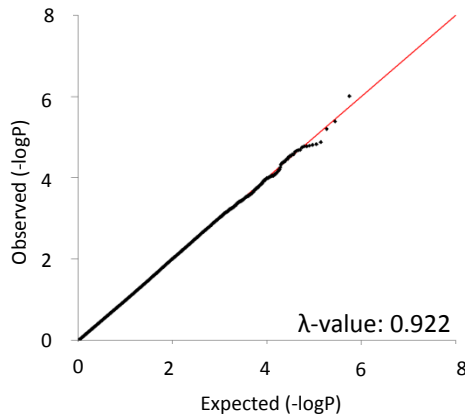**Cisplatin**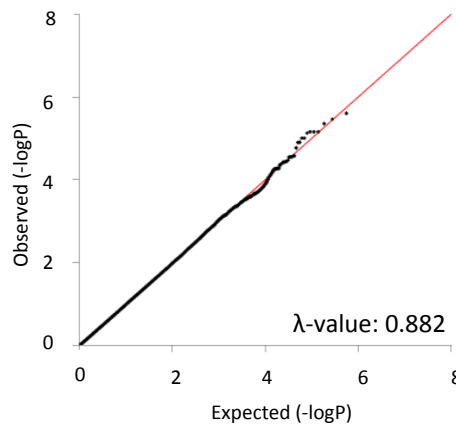**Carboplatin**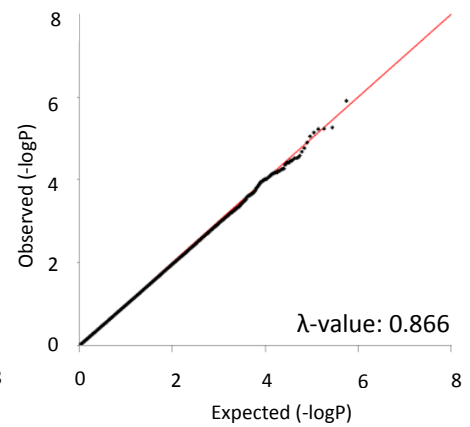**Anthracyclin-based**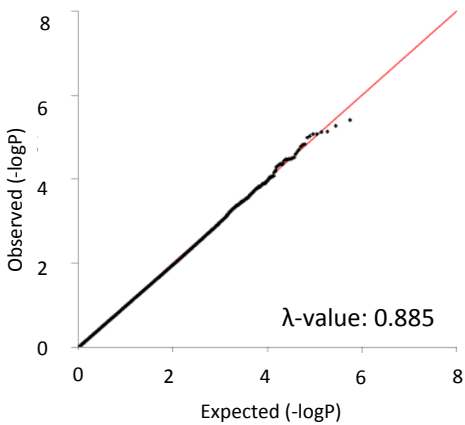**Adriacin**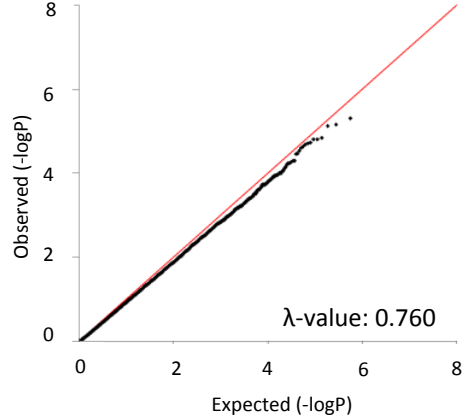**Epirubicin**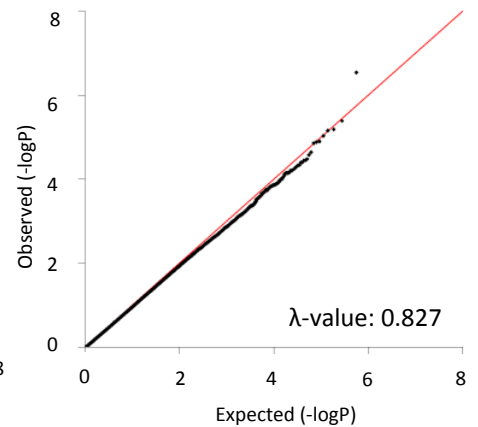

**Fig. S1:** Quantile-quantile plots of 17 GWAS of drugs/drug subgroups induced severe neutropenia and their corresponding lambda ( $\lambda$ ) value (continue)

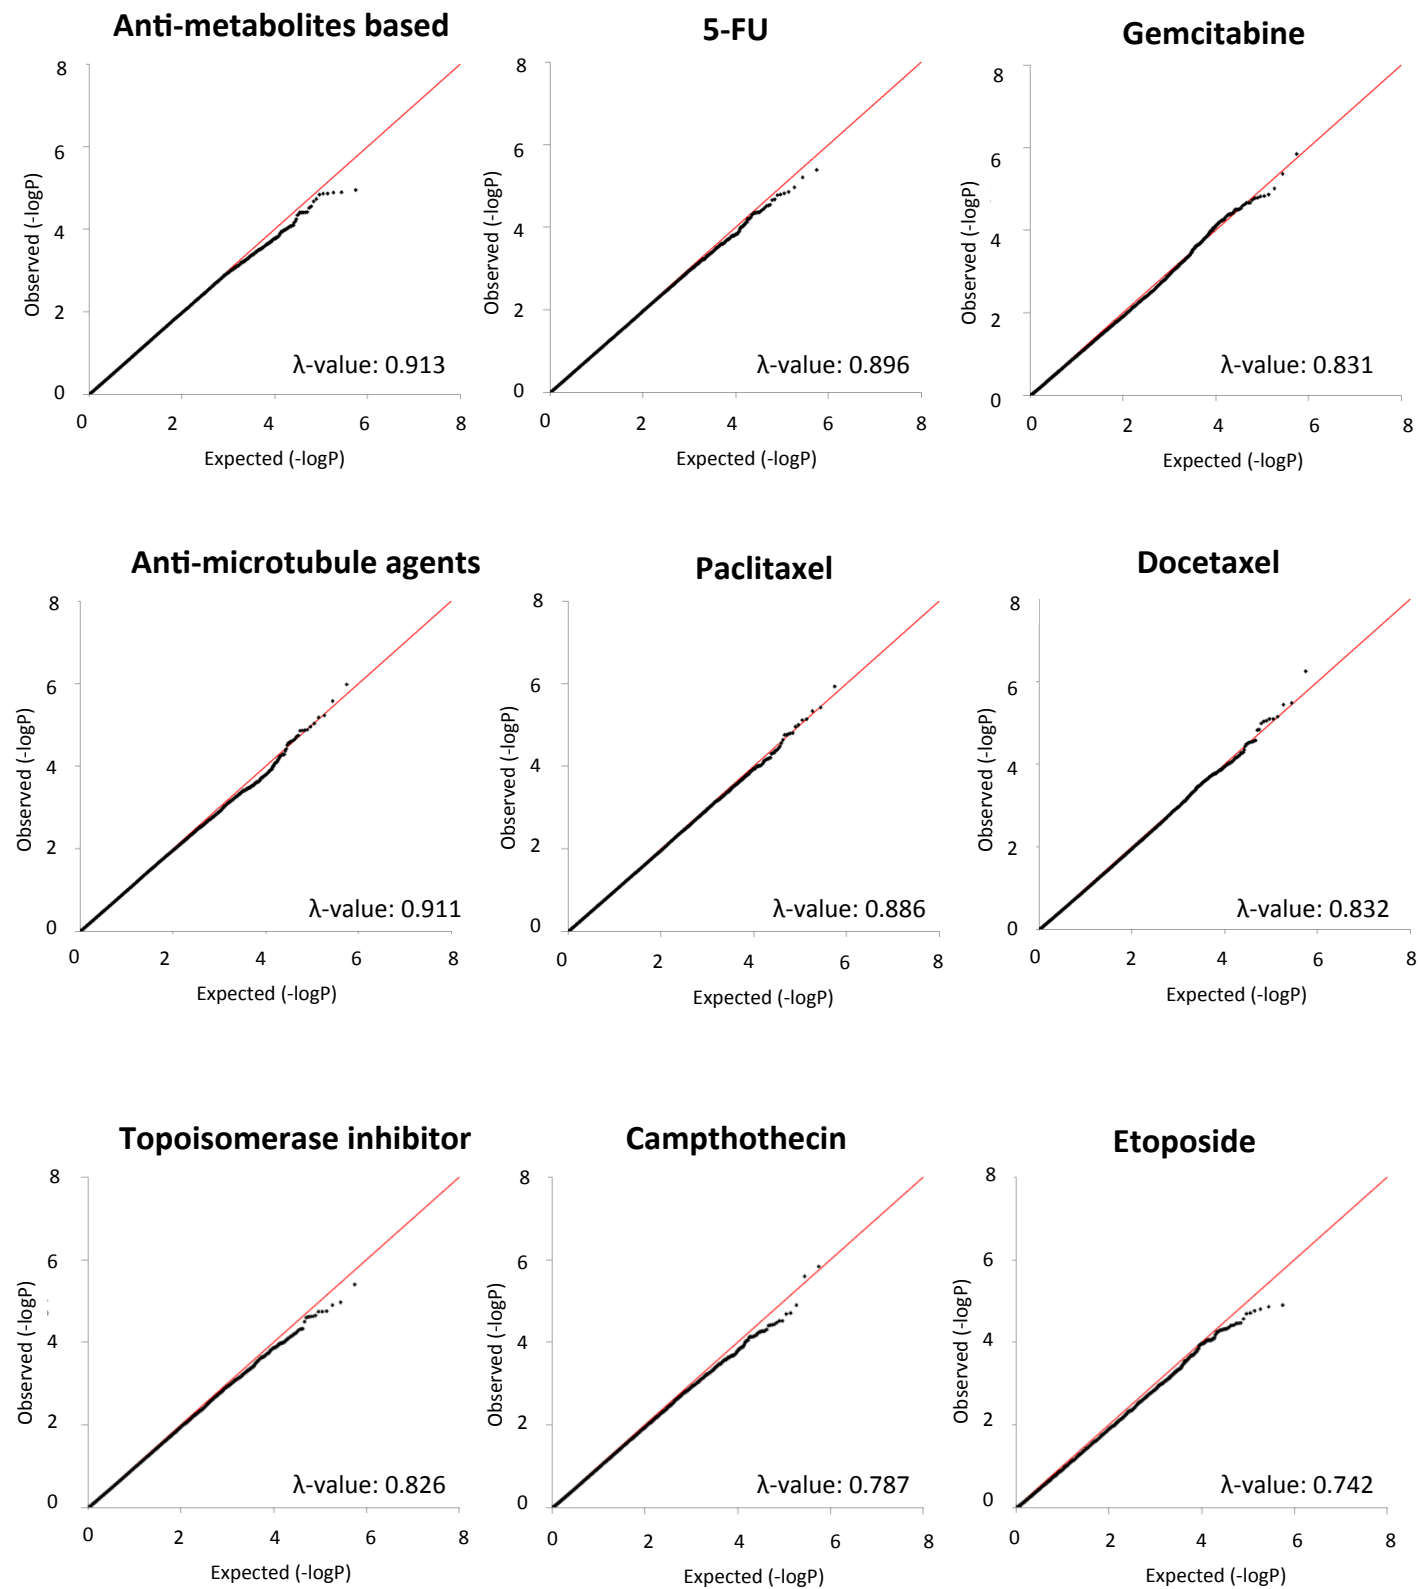

**Fig. S1:** Quantile-quantile plots of 17 GWAS of drugs/drug subgroups induced severe neutropenia and their corresponding lambda ( $\lambda$ ) value

### Cyclophosphamide

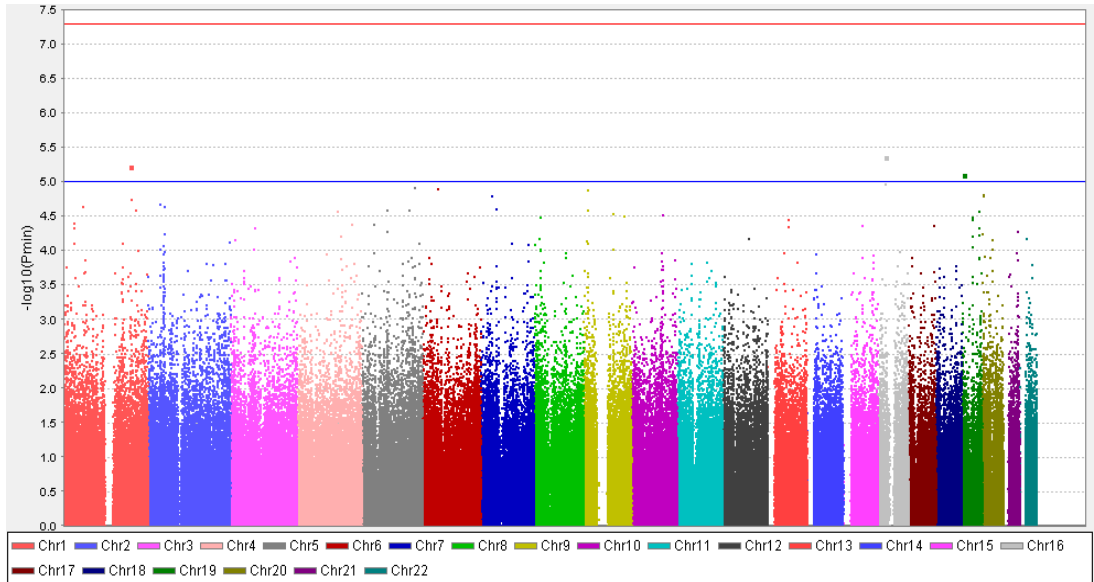

### Paclitaxel + Carboplatin

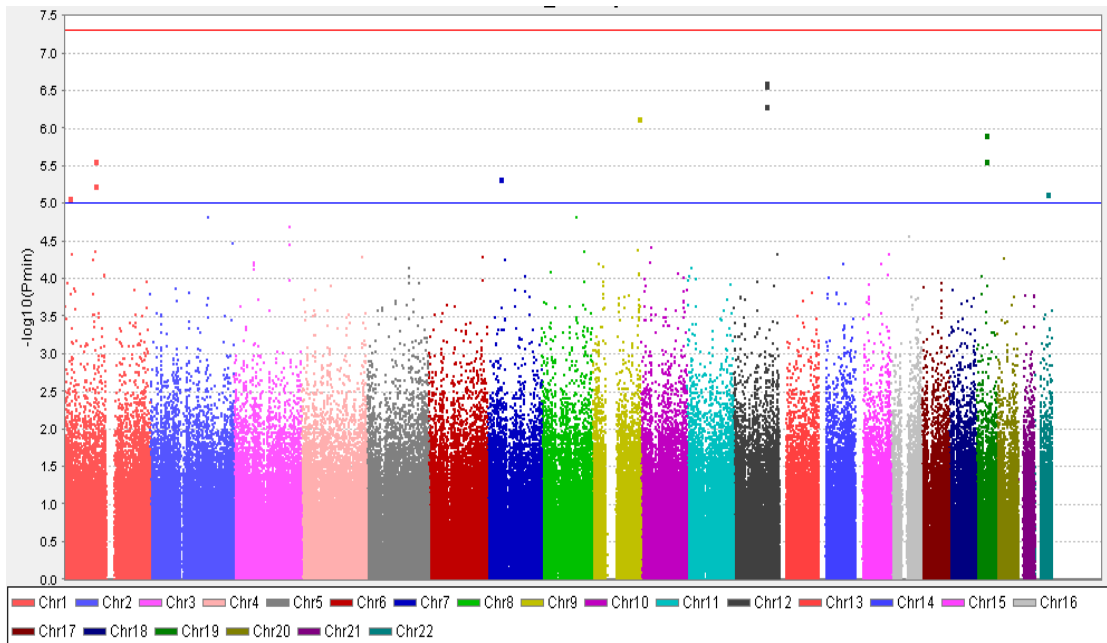

**Fig. S2a:** Manhattan plot for GWAS of cyclophosphamide and paclitaxel + carboplatin induced severe neutropenia/leucopenia

### All\_Platinum\_based

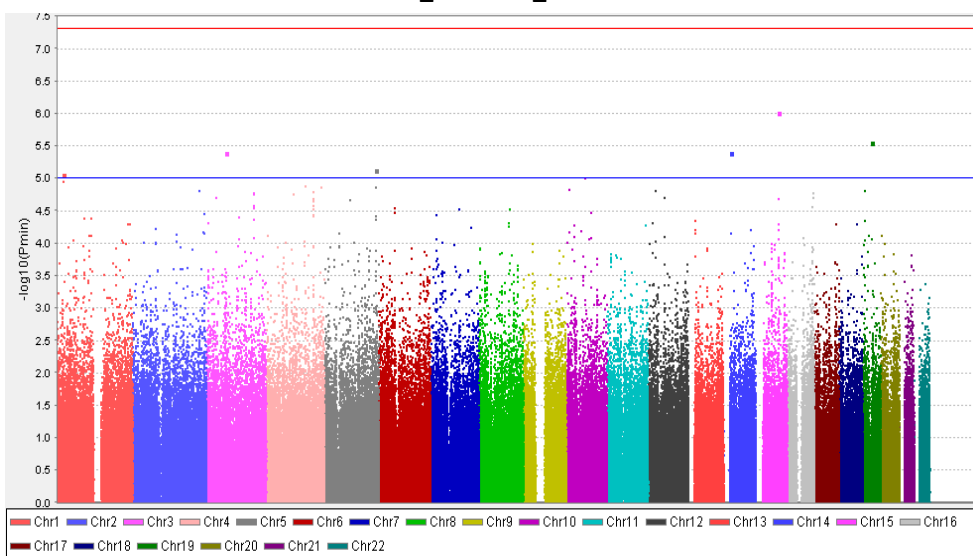

### Cisplatin

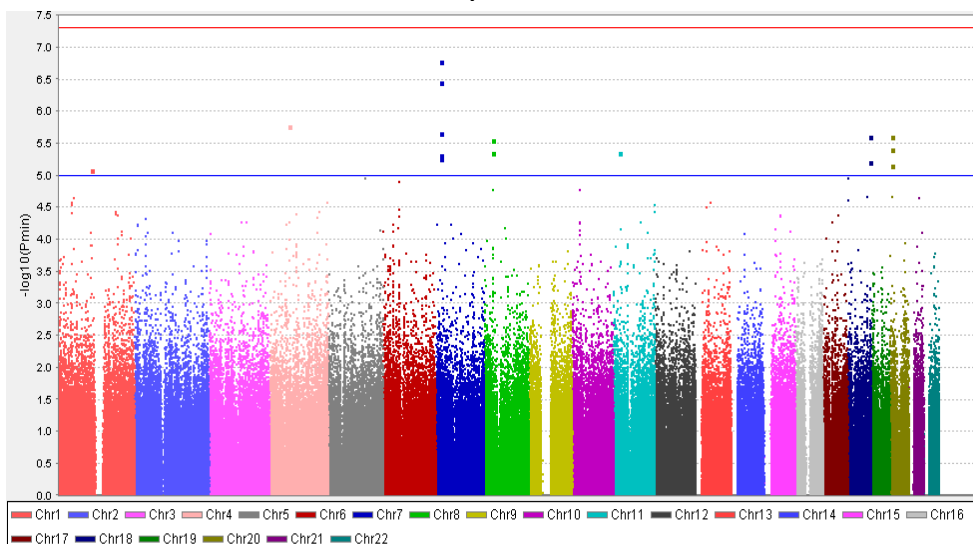

### Carboplatin

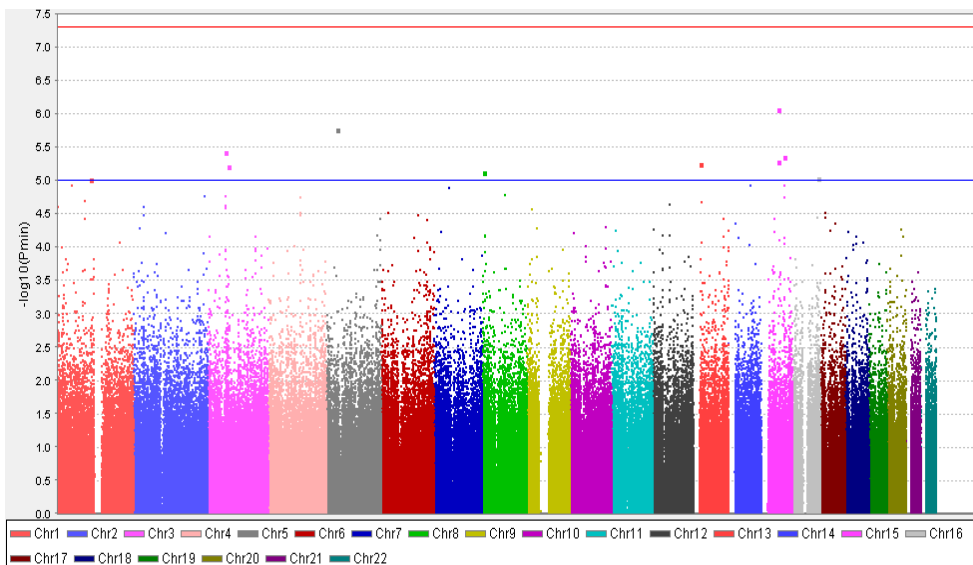

**Fig. S2b:** Manhattan plot for GWAS All types of platinum-agents, cisplatin and carboplatin induced severe neutropenia/leucopenia

### All\_Anthracycline\_based

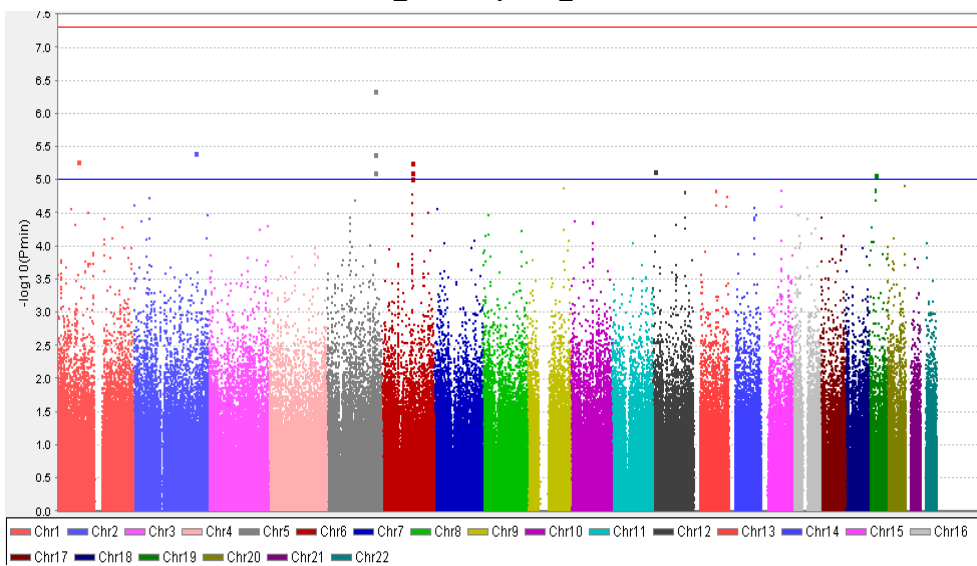

### Adriacin

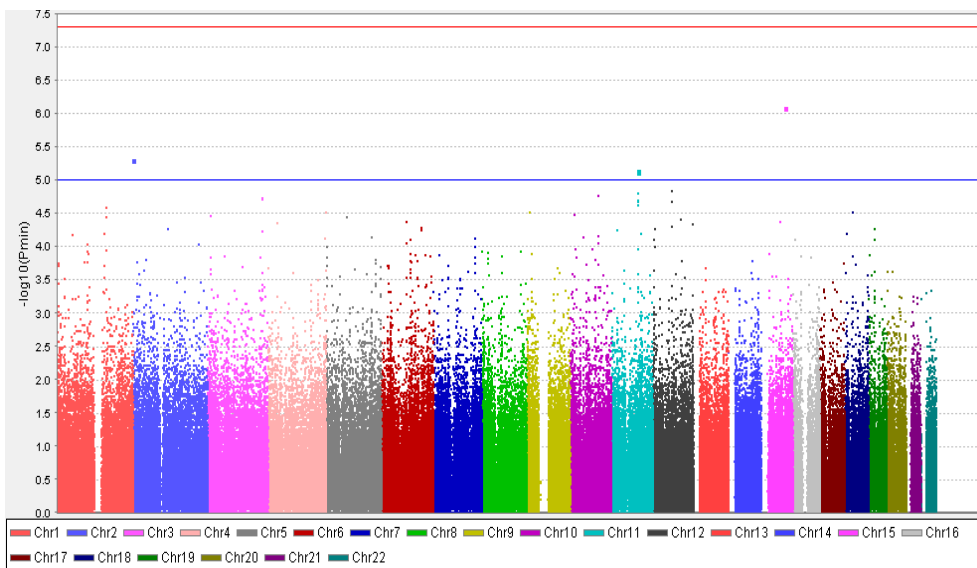

### Epirubicin

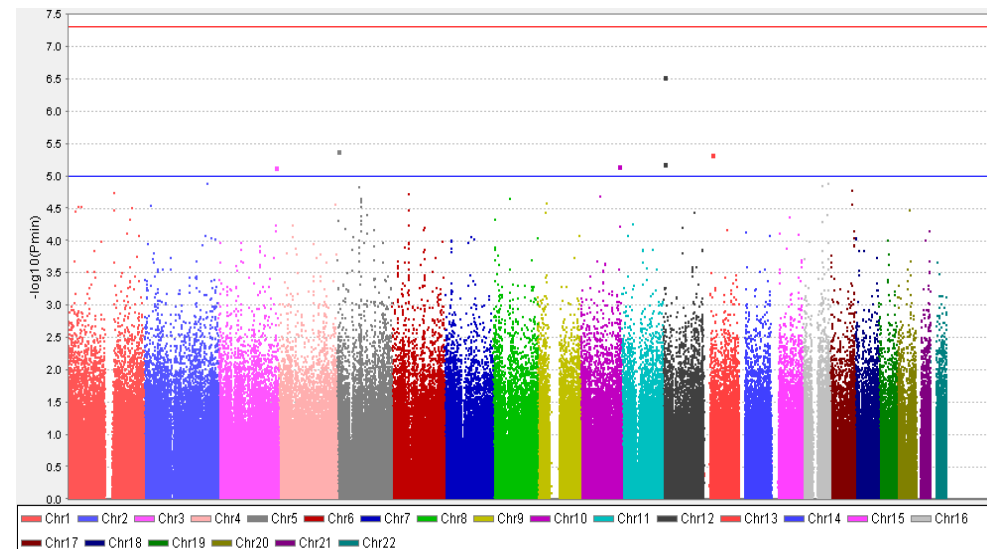

**Fig. S2c:** Manhattan plot for GWAS All types of anthracycline-based, Adriacin and Epirubicin induced severe neutropenia/leucopenia

### All\_anti-metabolites agents

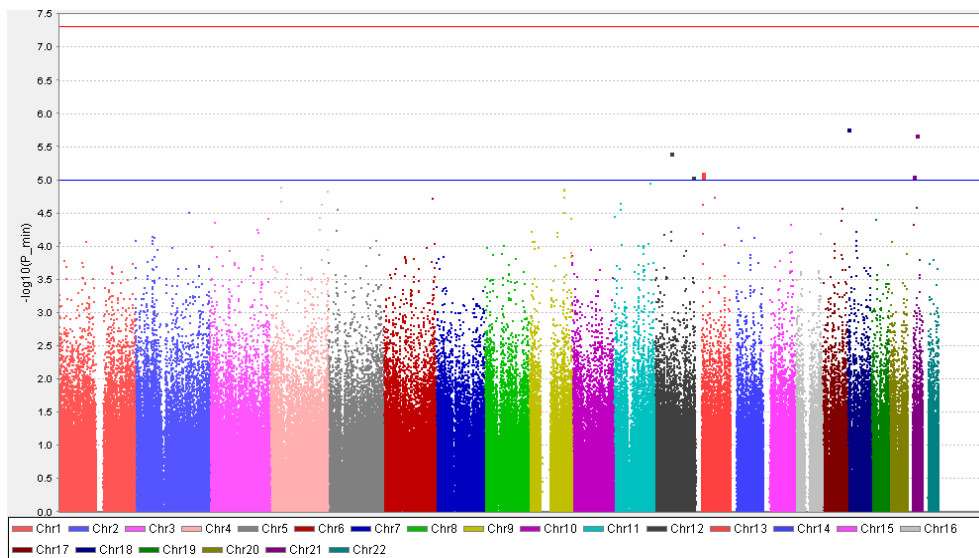

### 5-FU

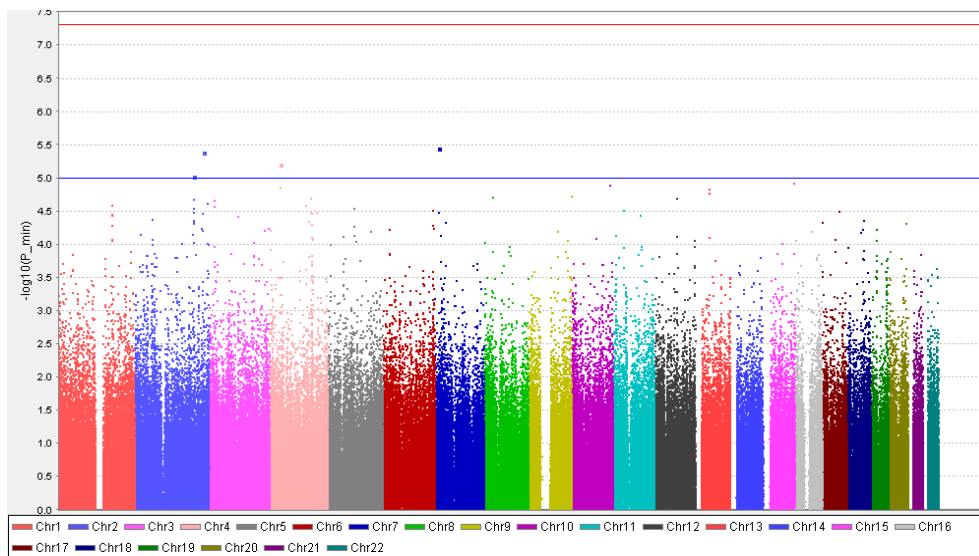

### Gemcitabine

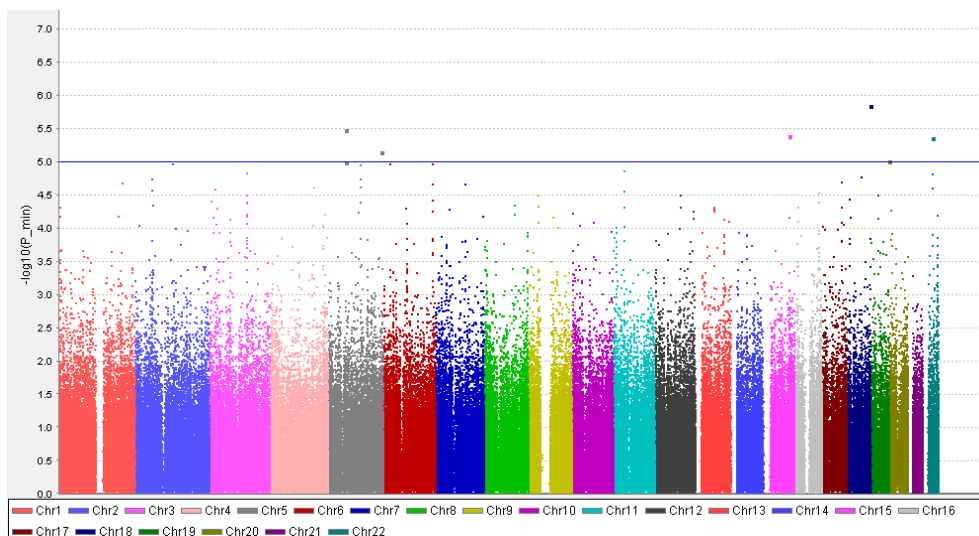

**Fig. S2d:** Manhattan plot for GWAS All types of anti-metabolites based, 5-FU and Gemcitabine induced severe neutropenia/leucopenia

### All\_anti-microtubules agents

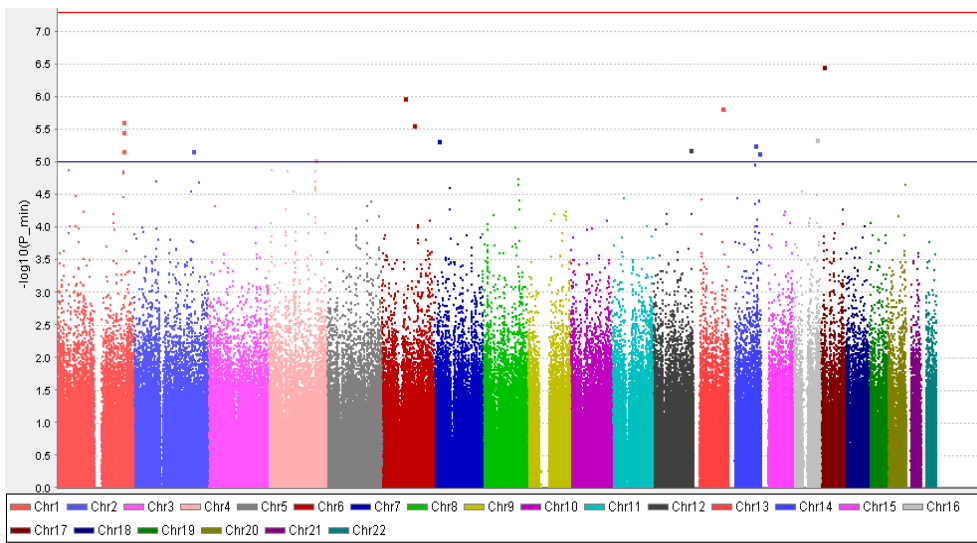

### Paclitaxel

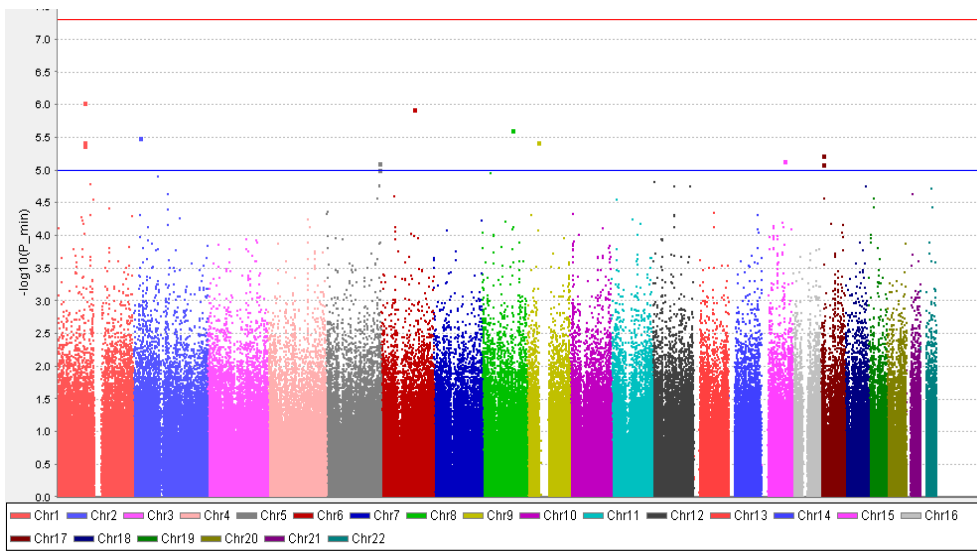

### Docetaxel

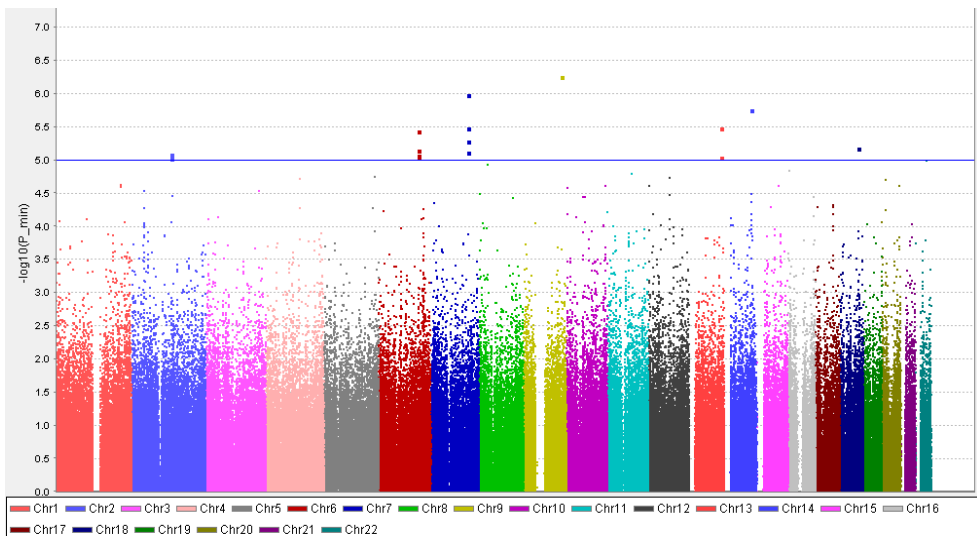

**Fig. S2e:** Manhattan plot for GWAS All types of anti-microtubules based, Paclitaxel and Docetaxel induced severe neutropenia

### All\_Topoisomerase\_inhibitors

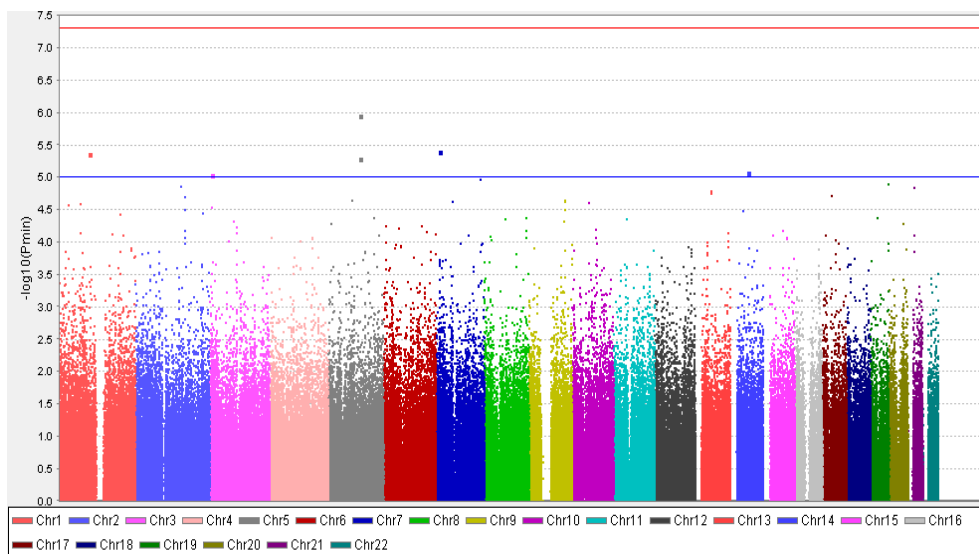

### Camptothecin

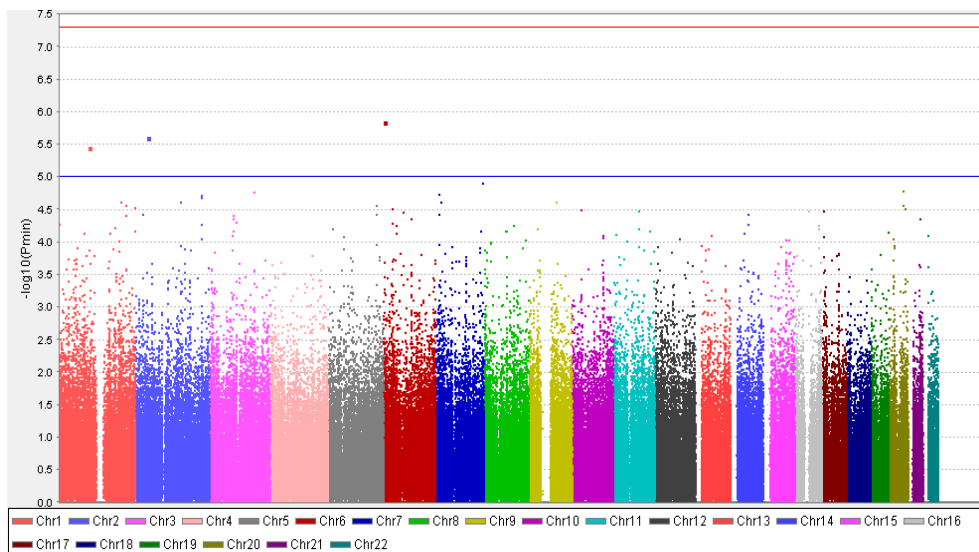

### Etoposide

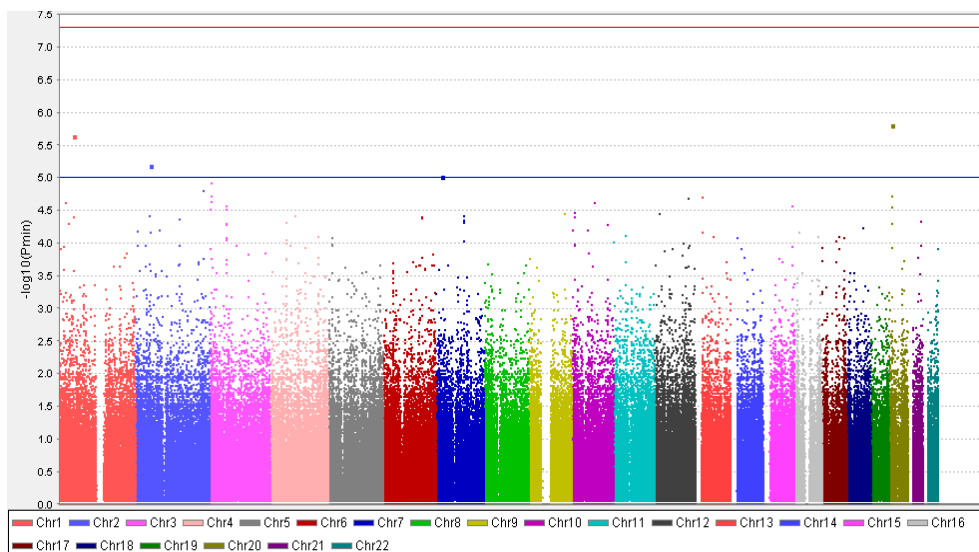

**Fig. S2f:** Manhattan plot for GWAS All types of topoisomerase inhibitors, Camptothecin and Etoposide induced severe neutropenia/leucopenia
